# Supplementary material for: RETRACTED: Crocin Inhibits Angiogenesis and Metastasis in Colon Cancer via TNF-α/NF-kB/VEGF Pathways
Source: MDPI journal article supplement (doi:10.3390/cells11091502), 2022-04-29
Supplement: s1 [file s1]

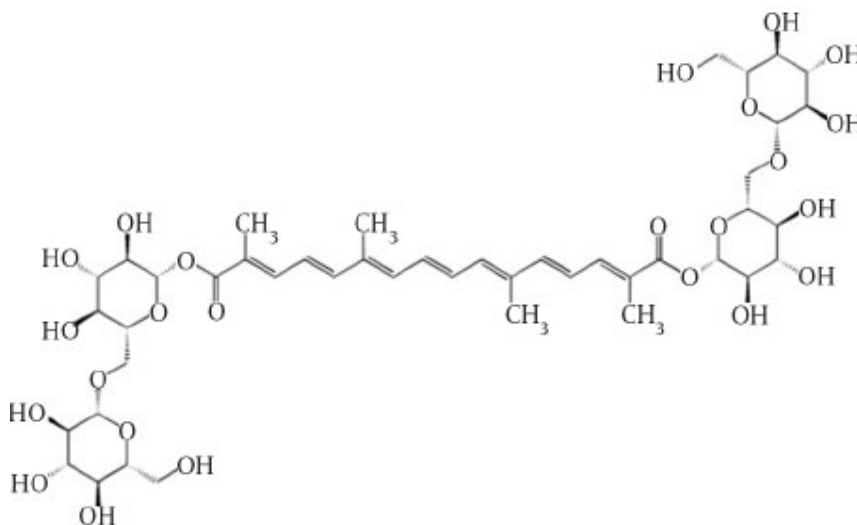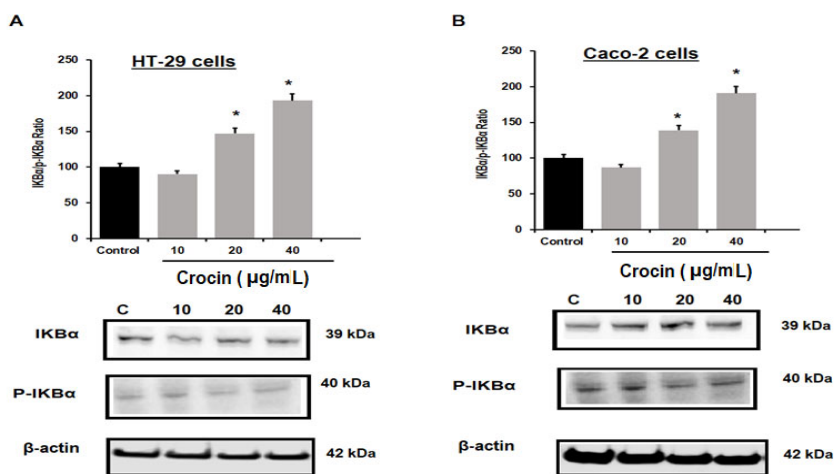

**Figure S2.** Effect of crocin on the IKBa/p-IKBa ratio in human colon cancer cells. (A) HT-29 cells (B) Caco-2 cells treated with 10, 20 and 40 µg/mL of crocin for 24 h. Cell lysates were analyzed by western blotting and IKBa and p-IKBa protein bands were detected using specific antibodies. Densitometric quantification of the autoradiograms for IKBa and p-IKBa was performed, and the IKBa/p-IKBa ratio was calculated. The data were described as mean ± SD, *n* = 3. Asterisks indicate significant difference compared to control (\* *p* < 0.05).

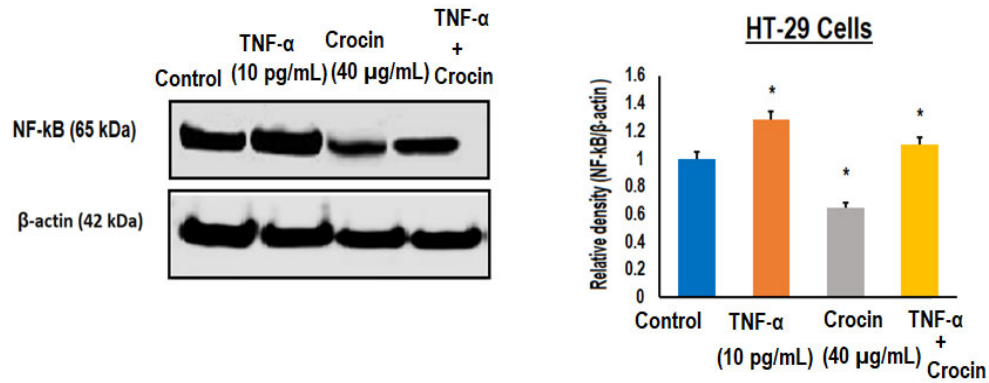

**Figure S3.** Effect of crocin on TNF- $\alpha$  induced NF- $\kappa$ B activation in HT-29 colon cancer cells. HT-29 cells were treated with 10 pg/mL concentration of TNF- $\alpha$ , 40  $\mu$ g/mL of crocin and combination of TNF- $\alpha$  and crocin for 24 h. Cell lysates were analyzed by western blotting and NF- $\kappa$ B and  $\beta$ -actin protein bands were detected using specific antibodies. Densitometric quantification of the autoradiograms for NF- $\kappa$ B and  $\beta$ -actin was performed, and the relative density of NF- $\kappa$ B/  $\beta$ -actin ratio was calculated. The data were described as mean  $\pm$  SD,  $n = 3$ . Asterisks indicate significant difference compared to control (\*  $p < 0.05$ ).

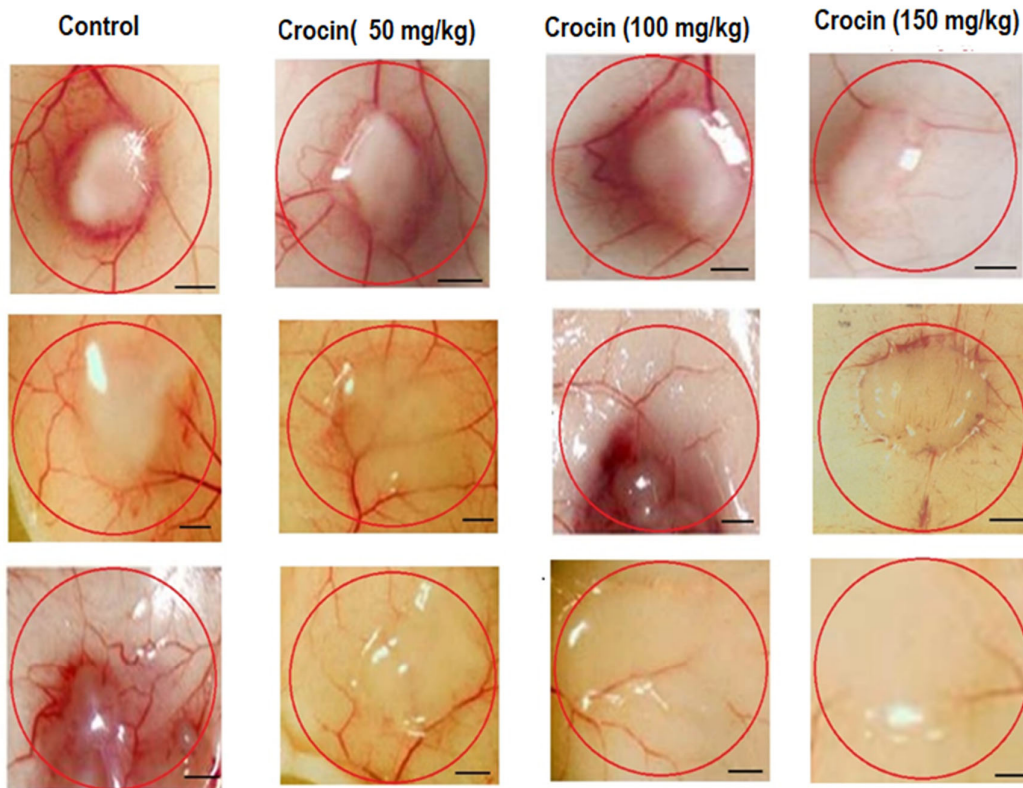

**Figure S4.** Effect of crocin on tumour induced angiogenesis. Induction of tumour induced angiogenesis, HT-29 cells ( $1 \times 10^6$ ) were implanted and new blood vessels formation was evaluated after 7 days by light microscope. (A) The effect of crocin on inhibition of tumour induced angiogenesis.

All data were expressed in mean  $\pm$  SD,  $n = 6$ ,  $p < 0.05$ ;  $p < 0.01$  was considered significant. Scale bar = 50  $\mu\text{m}$ .

**Full Western-Blot Images of NF- $\kappa$ B, I $\kappa$ B $\alpha$ , P-I $\kappa$ B $\alpha$ , VEGF, and  $\beta$ -actin Antibodies in HT-29 Cells and Caco-2 Cells**

The band density and molecular weight of each antibodies are given in the Figure 5.

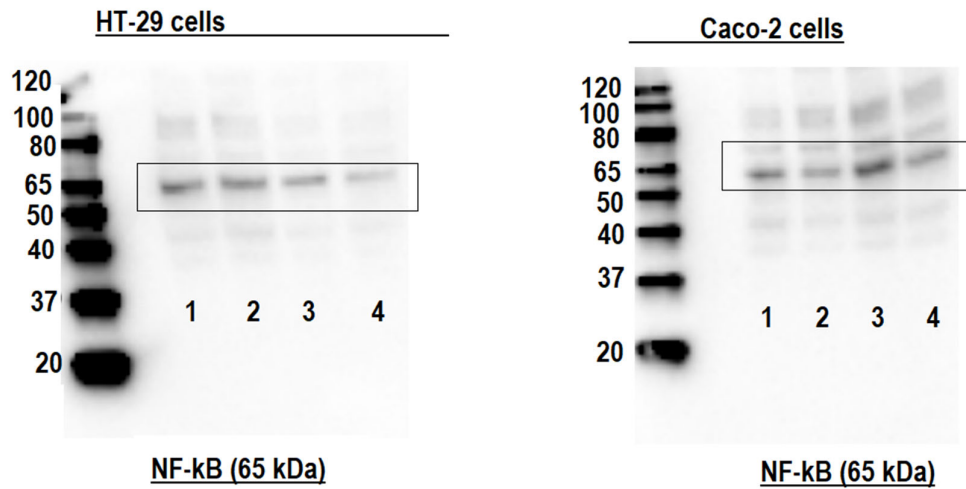

**Figure S5.** Full Western-blot Images of NF- $\kappa$ B antibodies in HT-29 Cells and Caco-2 Cells.

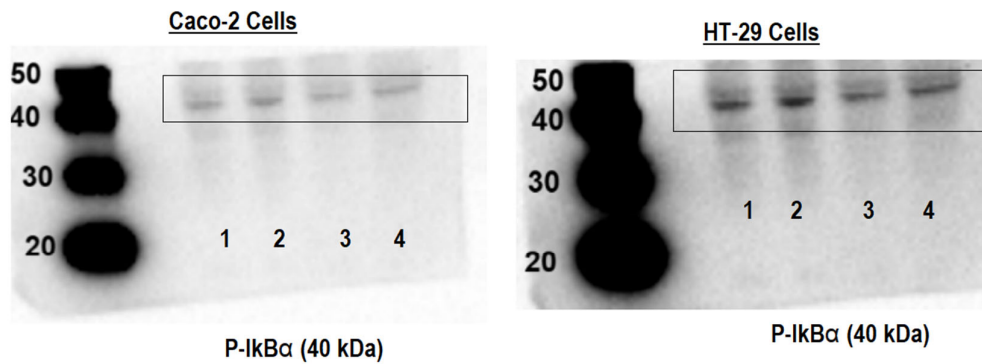

**Figure S6.** Full Western-blot Images of P-I $\kappa$ B $\alpha$  antibodies in HT-29 Cells and Caco-2 Cells.

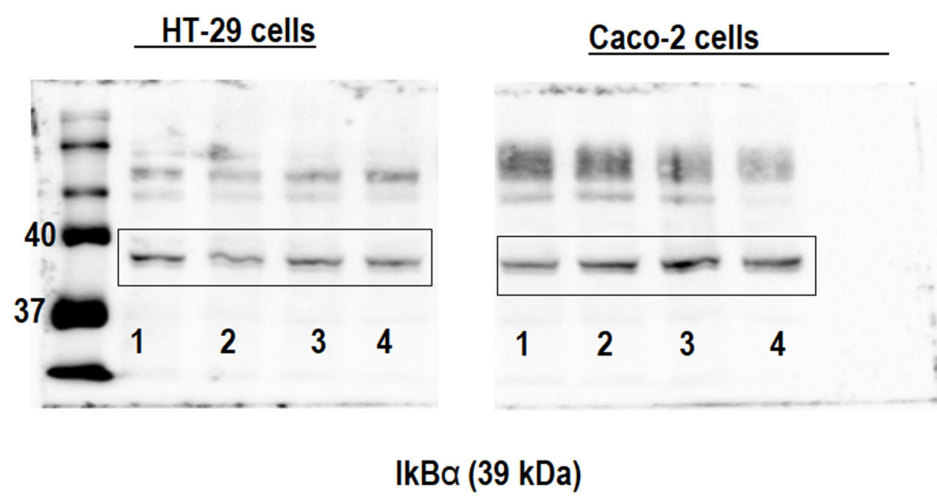

**Figure S7.** Full Western-blot Images of IkB $\alpha$  antibodies in HT-29 Cells and Caco-2 Cells.

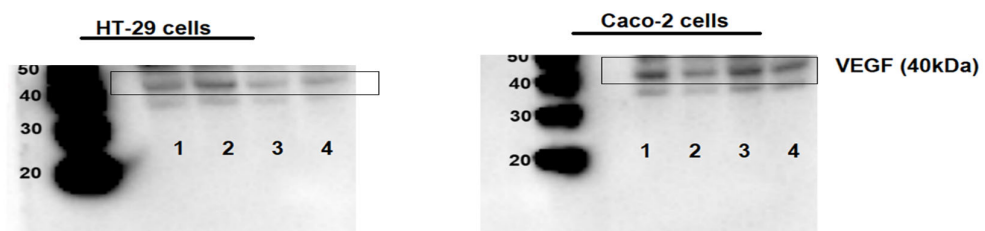

**Figure S8.** Full Western-blot Images of VEGF antibodies in HT-29 Cells and Caco-2 Cells.

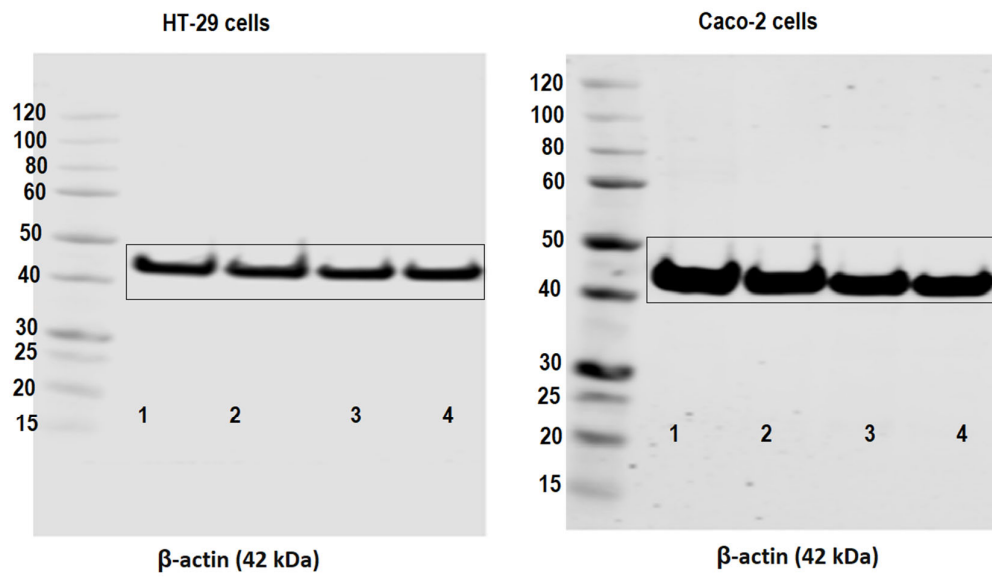

**Figure S9.** Full Western-blot Images of  $\beta$ -actin antibodies in HT-29 Cells and Caco-2 Cells.
